# Supplementary material
Source: PubMed Central journal article supplement (PMC6930341)

# Supplementary Figure 1. Uncropped scans with size marker indications

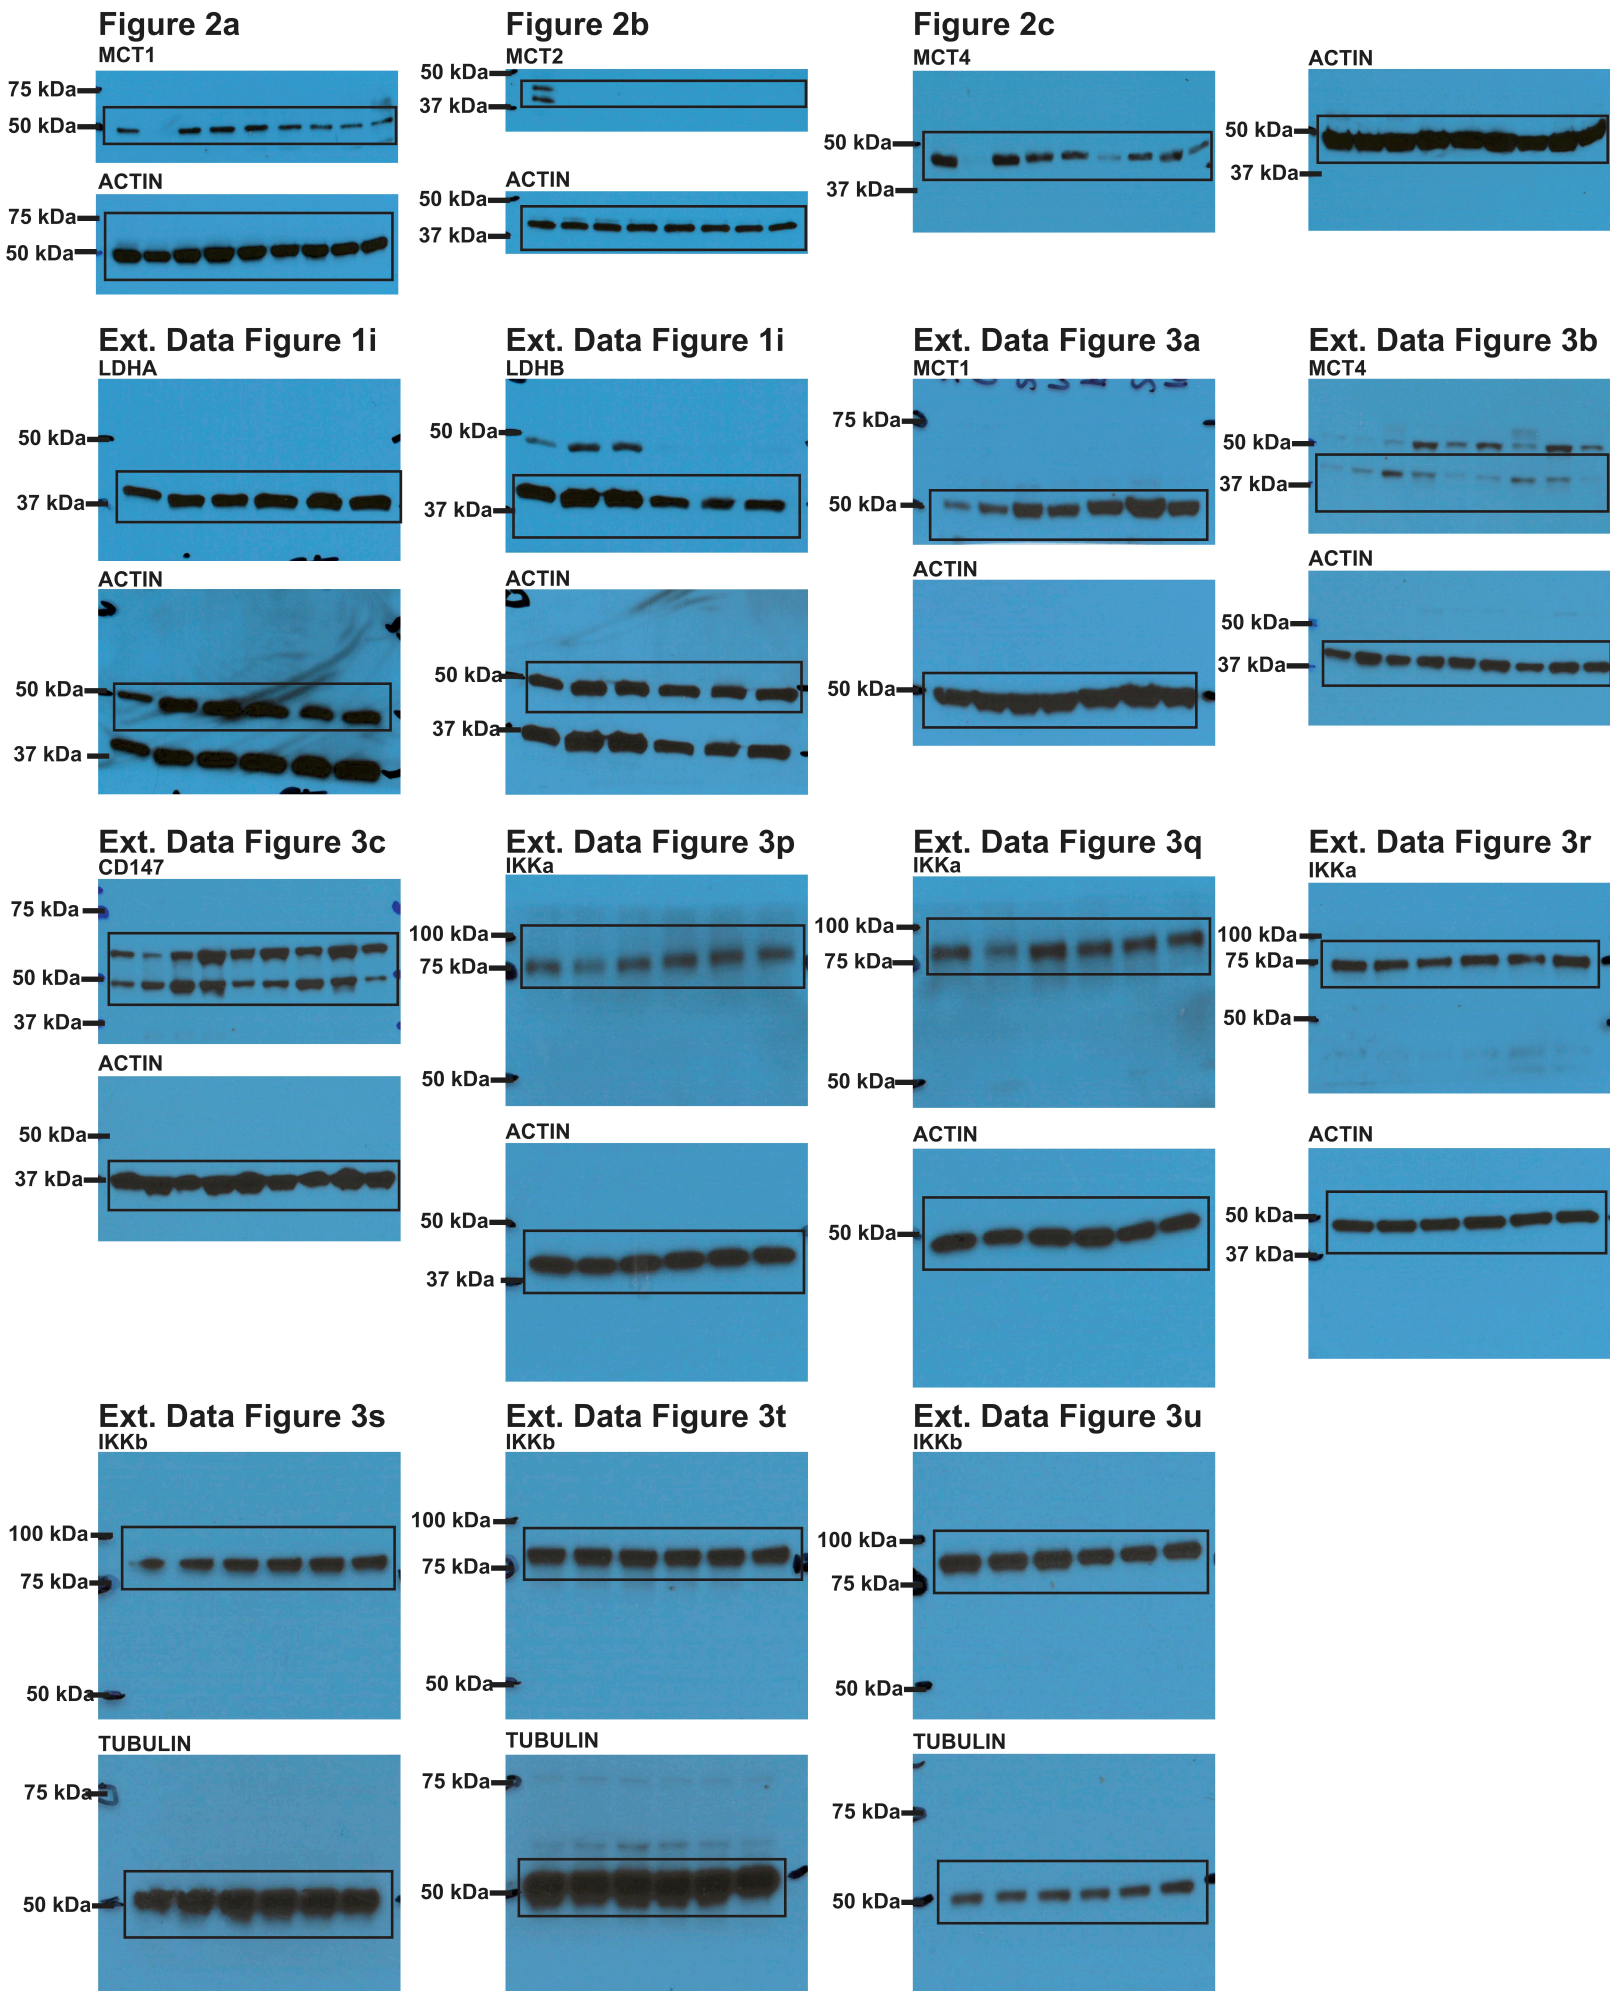

Supplement: NIHMS1541745-supplement-1.pdf [file NIHMS1541745-supplement-1.pdf]
